# Supplementary material for: Molecularly Imprinted Magnetic Fluorescent Nanocomposite-Based Sensor for Selective Detection of Lysozyme
Source: MDPI journal article supplement (doi:10.3390/nano11061575), 2021-06-15
Supplement: s1 [file s1]

## Supplementary Materials

# Molecularly Imprinted Magnetic Fluorescent Nanocomposite-Based Sensor for Selective Detection of Lysozyme

Xin Zhang <sup>1,\*</sup>, Bo Tang <sup>2</sup>, Yansong Li <sup>1</sup>, Chengbin Liu <sup>1</sup>, Pengfei Jiao <sup>1</sup> and Yuping Wei <sup>1</sup>

<sup>1</sup> School of Life Science and Agricultural Engineering, Nanyang Normal University, Nanyang 473061, China, li.yansong1989@163.com (Y.L.), liuchengbin@tio.org.cn (C.L.), dongbx@nynu.edu.cn (P.J.), ypwei@ipe.ac.cn (Y.W.)

<sup>2</sup> Key Laboratory of Molecular Medicine and Biotherapy, School of Life Science, Beijing Institute of Technology, Beijing 100081, China, 3120170650@bit.edu.cn

\* Correspondence: 21588330@bit.edu.cn

### 1. Synthesis of *L*-Cysteine Capped-Modified Mn<sup>2+</sup>:ZnS QDs

*L*-cysteine-capped ZnS QDs were synthesized according reported methods with some modifications [1]. 1.8 g ZnSO<sub>4</sub>·7H<sub>2</sub>O, 0.1 g MnCl<sub>2</sub>·4H<sub>2</sub>O, and 0.5 g *L*-cysteine were added into 25 mL deionized water. The mixture was stirred under N<sub>2</sub> and in the dark at 30 °C for 2 h. Then 5 mL of Na<sub>2</sub>S·9H<sub>2</sub>O (0.25 mol L<sup>-1</sup>) was added in dropwise. The above solutions were stirred under N<sub>2</sub> and in the dark for 20 h. The prepared *L*-cysteine-capped modified Mn<sup>2+</sup>:ZnS QDs were washed with water and ethanol to remove unreacted substances and dried under vacuum.

### 2. Prepared of Carboxyl-Functionalized Fe<sub>3</sub>O<sub>4</sub> MNPs

Carboxyl modified d Fe<sub>3</sub>O<sub>4</sub> MNPs were synthesized according reported methods [2]. 3.9 g FeCl<sub>3</sub>·6H<sub>2</sub>O, 1.2 g Na<sub>3</sub>Cit<sub>2</sub>·H<sub>2</sub>O, and 1.8 g NaAc were dissolved in 120 mL ethylene glycol and stirred for 30 min. The solution was transferred into a steel autoclave and heated at 200 °C for 12 h. The resultant products were washed and dried under vacuum.

### 3. Binding Experiments

In all protein rebinding experiments, the MNP/QD@MIPs or MNP/QD@NIPs was dispersed in phosphate buffer with different concentrations of template Lyz at 25 °C. The binding kinetics was measured by detecting the fluorescence intensity changes of MNP/QD@MIPs with added Lyz at different incubation times. Binding isotherm experiments were performed by determining the adsorption capacities of MNP/QD@MIPs and MNP/QD@NIPs for Lyz (0.2 to 2.0 μM). The amount of protein adsorbed (*Q*, mg/g) by the MNP/QD@MIPs were calculated by:

$$Q = (C_0 - C_e) \frac{V}{W}$$

Where *C*<sub>0</sub> and *C*<sub>*e*</sub> (mg mL<sup>-1</sup>) are the initial concentration and the free concentration of the Lyz or competitive protein at equilibrium, *V* (mL) is the volume of the initial solution, and *W* (g) is the weight of the MNP/QD@MIPs or MNP/QD@NIPs.

### 4. Strategy for Using an MNP-QD@MIPs-Based Sensor for the Detection of Lysozyme

The detection strategy was mainly divided into two steps: (1) the selective separation of lysozyme in samples, and (2) fluorescence detection. (1) The MNP/QD@MIPs was dispersed into the samples. The target lysozyme molecule was specifically bound onto the

MNP/QD@MIPs via the MIP layer. Then MNP/QD@MIPs loaded with lysozyme molecule was magnetically decanted. (2) The collected MNP/QD@MIPs was redispersed in buffer solution, and the same concentration of MNP/QD@MIPs was dispersed in buffer solutions without lysozyme as a control. The fluorescence intensity of each sample was recorded, and the concentration of lysozyme in the samples was calculated. This method did not involve any other pretreatment procedures or additional instruments.

## 5. Quantum Yields

The quantum yields (QYs) of the MNP/QDs and MNP/QD@MIPs were calculated according to the following equation:

$$\phi_x = \phi_s \left[ A_s / A_x \right] \left[ \ln t_x / \ln t_s \right] \left[ \eta_x / \eta_s \right]^2$$

Where,  $\Phi$  is the quantum yield,  $A$  is absorbance at the excitation wavelength,  $Int$  is the area under the emission peak, and  $\eta$  is the refractive index of the solvent. The subscripts  $s$  and  $x$  denote the standard and samples, respectively. Rhodamine B (QY = 69% in ethanol) was used as a standard. The quantum yield (QY) of the MNP/QDs and MNP/QD@MIPs was 23.18% and 18.87 in ethanol.

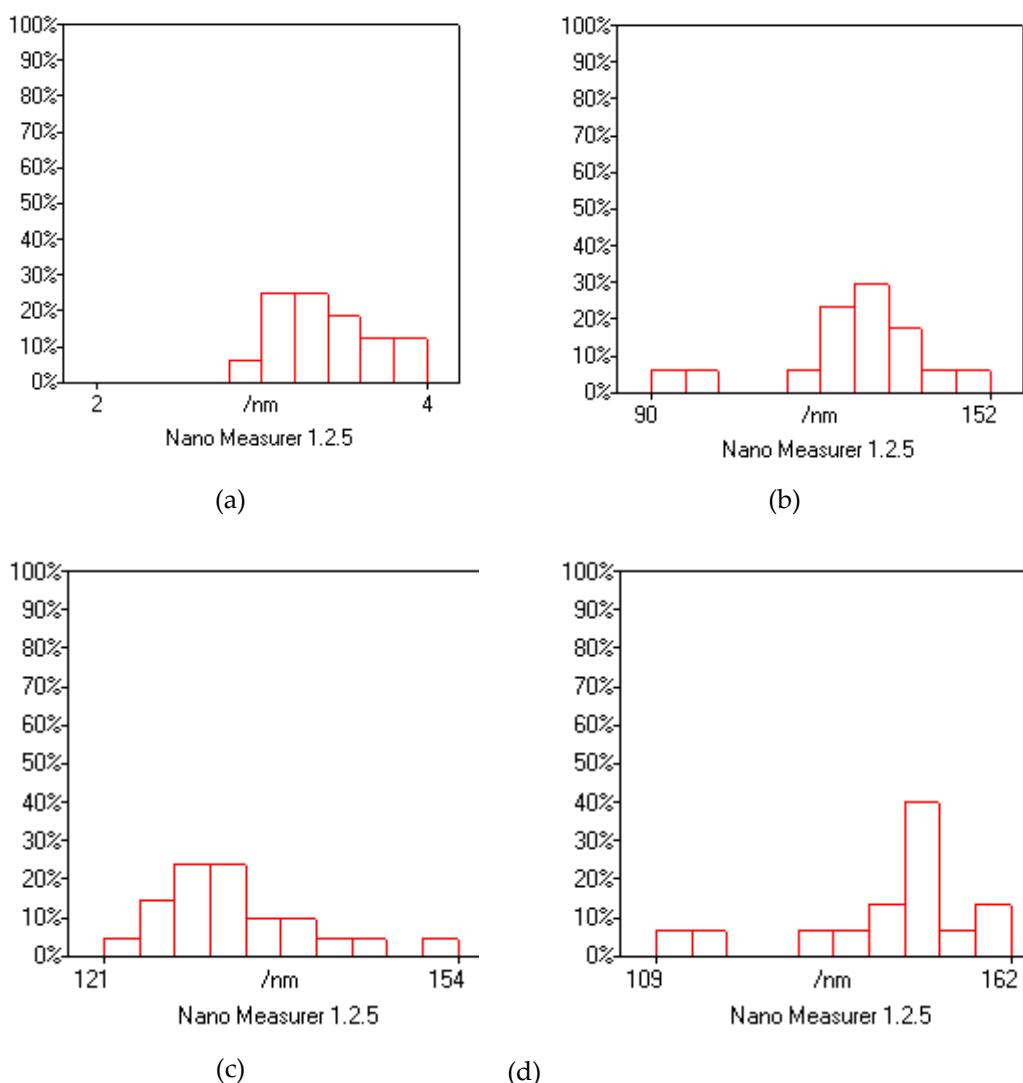

**Figure S1.** Particle size distribution (a)  $Mn^{2+}:ZnS$  QDs, (b) MNPs, (c) MNP/QD and (d) MNP/QD@MIPs.

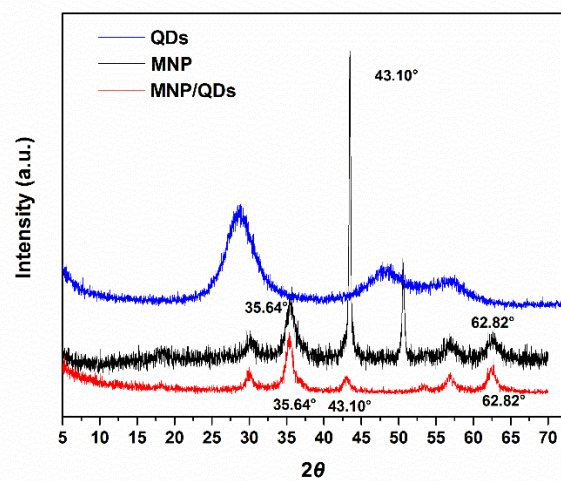

Figure S2. XRD of Mn<sup>2+</sup>:ZnSQDs, MNP, and MNP/QDs.

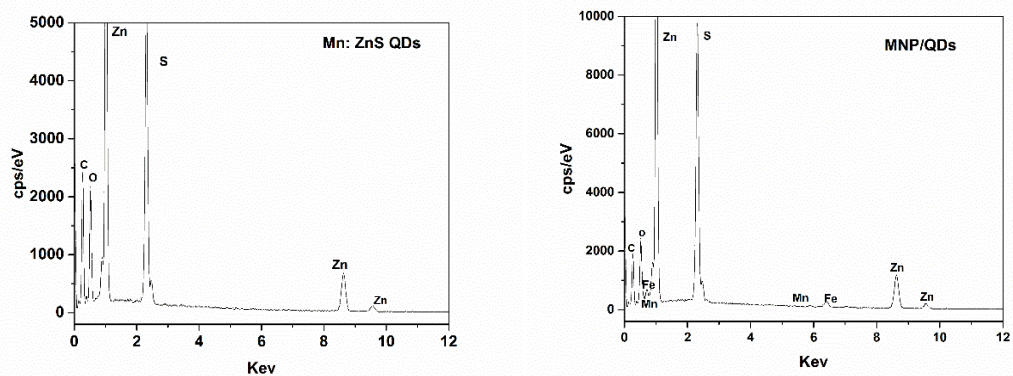

Figure S3. EDX of ZnS QDs and MNP/QDs.

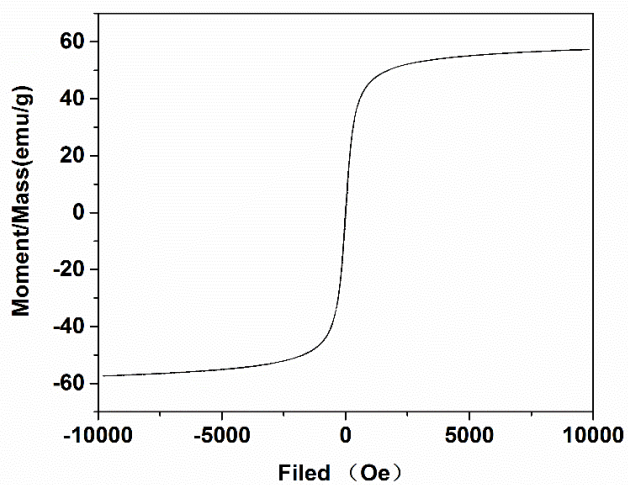

Figure S4. VSM of MNP.

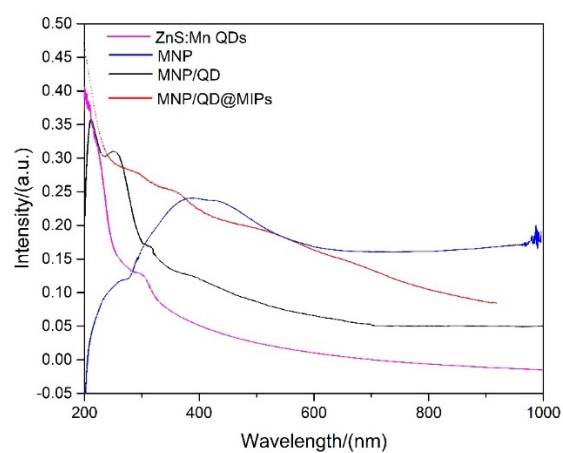

**Figure S5.** The UV-Vis spectra of MNP, MNP/QDs and MNP/QD@MIPs.

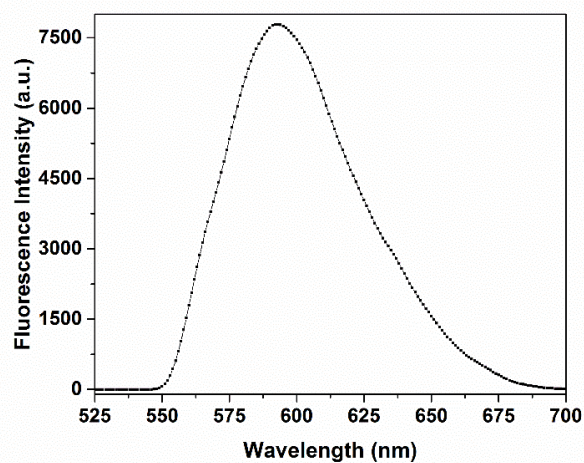

**Figure S6.** The fluorescence spectra of Mn:ZnS QDs.

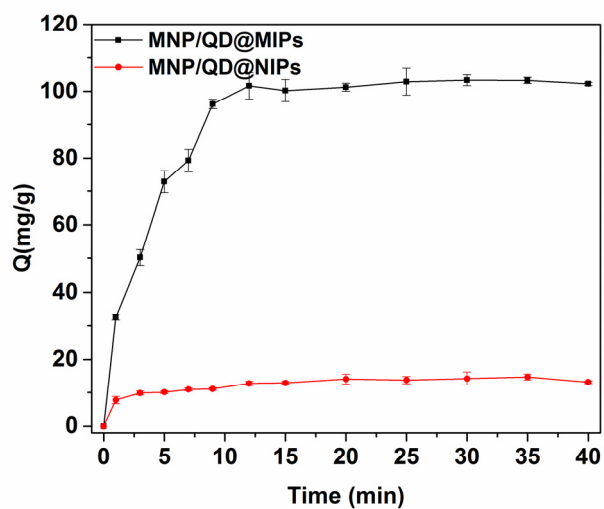

**Figure S7.** Binding kinetics of MNP/QD@MIPs and MNP/QD @NIPs for lysozyme.

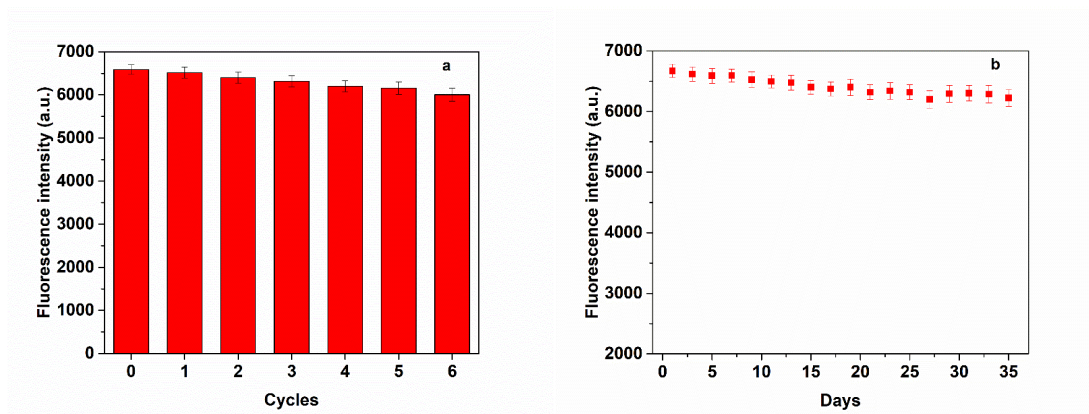

**Figure S8.** Stability and recyclability of MNP/QD@MIPs based sensor.

## Reference

1. Wang, H. F.; He, Y.; Ji, T. R.; Yan, X. P. Surface molecular imprinting on Mn-doped ZnS quantum dots for room-temperature phosphorescence optosensing of pentachlorophenol in water *Anal. Chem.* **2009**, *81*:1615-1621.
2. Yang, S.; Zhang, X.; Zhao, W.; Sun, L.; Luo, A. Preparation and evaluation of Fe<sub>3</sub>O<sub>4</sub> nanoparticles incorporated molecularly imprinted polymers for protein separation *J. Mater. Sci.* **2016**, *51*, 937-949.
